# Supplementary material
Source: MDPI journal article supplement (https://www.mdpi.com/2072-4292/11/14/1659)
Supplement: s1 [file s1]

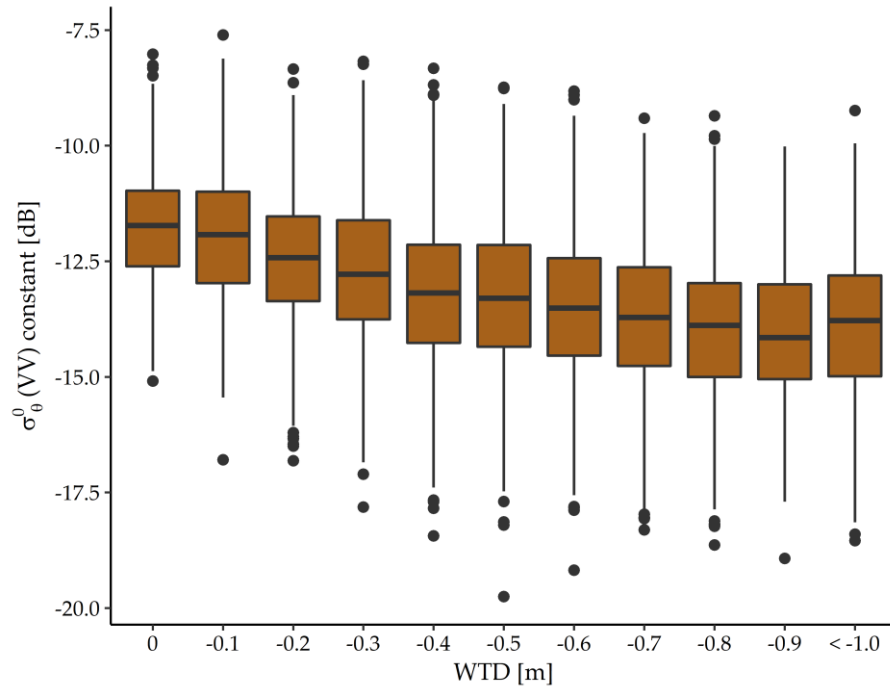

**Figure S1.** Boxplot of backscatter ( $\sigma^0$ (VV) constant: VV polarization normalised to a reference angle of  $40^\circ$  with a constant slope) for all 60 study sites and the entire study period shown for bins of water table depth (WTD) of 10 cm. The boxplot indicates the high and WTD-independent variability of absolute values of  $\sigma^0$ .
